# Supplementary material for: Socioeconomic deprivation, disease complications and access to preventive care in sickle cell disease in mainland France
Source: Research Square preprint supplement (doi:10.21203/rs.3.rs-7767414/v1), 2025-10-27
Supplement: Supplementary file 1 [file 5ae60a8266f3fd8da9804a33.docx]

**SUPPLEMENTARY MATERIAL**

**Socioeconomic deprivation, disease complications and access to preventive care in sickle cell disease in mainland France**

***Walter et al.***

**Table A.1.** Codes and classifications used to identify outcomes in the French national health database.

**Table A.2.** Demographics of the prevalent population.

**Table A.3.** Demographics of incident population.

**Table A.4** Chronic kidney disease in the prevalent population: analysis by age groups.

**Table A.1.** Codes and classifications used to identify outcomes in the French national health database.

| **Outcome** | **Classification** | **Code** | **Database** | **Validation** |
| --- | --- | --- | --- | --- |
| ***Acute Event*** |  |  |  |  |
| VOE | ICD-10 | D57.0 | Hospital database (primary discharge diagnosis) | Walter et al 33 |
| Stroke | ICD-10 | I63; I64; G45; I67.6; I60; I61; I69; I676; O225 | Hospital database (primary discharge diagnosis) | Giroud et al 35 |
| Priapism | ICD-10 | N483; N488 | Hospital database (primary discharge diagnosis) |  |
| ICU | PMSI-MCO | 01; 02; 03; 04; 05; 06; 13 ;14; 18 | Hospital database (primary discharge diagnosis) |  |
| ***Chronic complication*** | |  |  |  |
| Chronic kidney disease | CCAM | JVJB001; JVJB002; JVJF002; JVJF003; JVJF004; JVJF005; JVJF006; JVJF007; JVJF008; JVRP004; JVRP007; JVRP008; JVRP007; JVRP008; | Hospital database and out-of-hospital procedure data | Bannay et al 36 |
| ICD-10 | I120; I131; N032-N037; N052-N057; N18; N19 | Hospital database or long-term-disease | Bannay et al 36 |
| Chronic heart failure | ICD-10 | I110; I130; I132; I50; I21; I22; I252; I255 | Hospital database or long-term-disease | Bannay et al 36 |
| Retinopathy | CCAM | BGNP001; BGNP003; BGNP004; BGNP006; BGNP007; BGNP008 | Hospital database and out-of-hospital procedure data | Bannay et al 36 |
| **Access to preventive care** |  |  |  |  |
| Phenoxymethylpenicillin | ATC | J01CE02 | Out-of-hospital reimbursement data |  |
| Hydroxycarbamide | ATC | L01XX05 | Out-of-hospital reimbursement data |  |
| Folic acid | ATC | B03BB01; V04CX02; B03BB51 | Out-of-hospital reimbursement data |  |
| Pneumococcal polysaccharide vaccine | ATC | J07AL01 | Out-of-hospital reimbursement data |  |
| Trans-cranial doppler | CCAM | EAQM; EBQM | Hospital database and out-of-hospital procedure data |  |

Abbreviations: ATC: anatomical therapeutical chemical classification; CCAM: *classification commune des actes médicaux*; ICD-10: International Classification of Disease 10th version; PMSI-MCO: *programme de médicalisation des systèmes d’information - Médecine chirurgie obstétrique*; VOE: vaso-occlusive event.

**Table A.2.** Demographics of the prevalent population.

|  | Total | Advantaged group | Disadvantaged group | Test* |
| --- | --- | --- | --- | --- |
| Number of patients, n | 13,730 | 7,825 | 5,905 |  |
| Age at 01/01/2019, years, mean (sd) | 22.0 (15.9) | 22.8 (16.1) | 21.0 (15.4) | <0,01 |
| Women, n (%) | 7,444 (54.2) | 4,298 (54.9) | 3,146 (53.3) | 0.01 |
| LTD, n (%) | 11,681 (85.1) | 6,600 (84.3) | 5,081 (86.0) | 0.01 |
| Death, n (%) | 466 (3.4) | 263 (3.4) | 203 (3.4) | 0.81 |

Abbreviation: LTD: long-term-disease.

*Chi square test for qualitative data, student’s t-test for quantitative data.

**Table A.3.** Demographics of incident population.

|  | Total | Advantaged group | Disadvantaged group | Test* |
| --- | --- | --- | --- | --- |
| Number of patients, n | 3,585 | 2,000 | 1,585 |  |
| Age at 01/01/2019, years, mean (sd) | 4.7 (2,6) | 4.6 (2,6) | 4.8 (2,5) | 0,02 |
| Women, n (%) | 1,770 (49.37) | 978 (48,9) | 792 (50.0) | 0,53 |
| LTD, n (%) | 3,235 (90.2) | 1,802 (90.1) | 1,433 (90.4) | 0,76 |
| Death, n (%) | 25 (0,7) | 15 (0,8) | 10 (0,6) | 0,67 |

Abbreviation: LTD: long-term-disease.

*Chi square test for qualitative data, student’s t-test for quantitative data.

**Table A.4.** Chronic kidney disease in the prevalent population: analysis by age group.

| Patients by group (total and with CKD) | < 10 years | | | |  | 10-19 years | | | |  | 20 – 29 years | | | |  | ≥30 years | | | |
| --- | --- | --- | --- | --- | --- | --- | --- | --- | --- | --- | --- | --- | --- | --- | --- | --- | --- | --- | --- |
|  | Total | Adv. group | Disadv. group | Test* |  | Total | Adv. group | Disadv. group | Test* |  | Total | Adv. group | Disadv. group | Test* |  | Total | Adv. group | Disadv. group | Test* |
| Total, n | 3,859 | 2,126 | 1,733 |  |  | 3,080 | 1,650 | 1,430 |  |  | 2,882 | 1,642 | 1,240 |  |  | 3,967 | 2,446 | 1,521 |  |
| CKD, n (%) | 57 (1.5) | 23 (1.1) | 34 (2.0) | 0.02 |  | 88 (2.9) | 39 (2.4) | 49 (3.4) | 0.08 |  | 154 (5.4) | 81 (4.9) | 73 (5.9) | 0.26 |  | 442 (11.1) | 268 (11.0) | 174 (11.4) | 0.67 |

Abbreviations: Adv.: advantaged; CKD: Chronic kidney disease; Disadv.: disadvanatged; LTD: long-term-disease;

*Chi square
